# Supplementary material for: Mechanism of Curcuma wenyujin Rhizoma on Acute Blood Stasis in Rats Based on a UPLC-Q/TOF-MS Metabolomics and Network Approach
Source: PubMed Central journal article supplement (PMC6337646; doi:10.3390/molecules24010082), 2018-12-27
Supplement: molecules-24-00082-s001.pdf [file molecules-24-00082-s001.pdf]

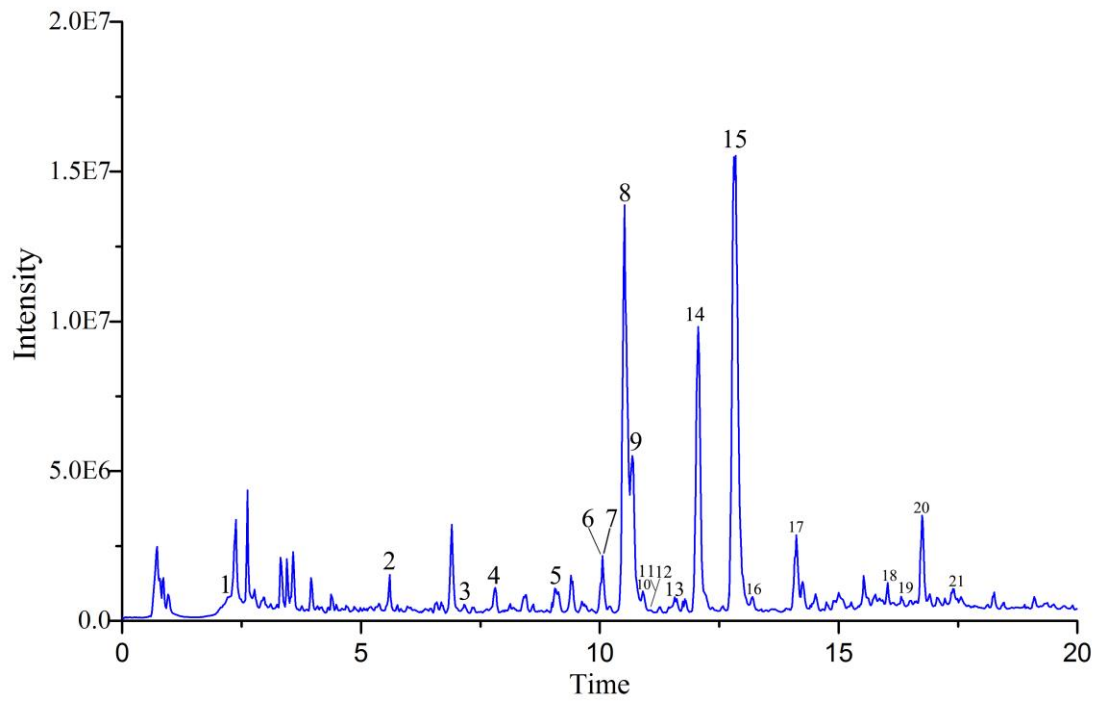

**Fig. S1** Total ionic chromatogram of EZhu by UPLC-Q/TOF-MS.

**Table.S1** Identification of 21 chemical compounds in EZhu by UPLC-Q/TOF-MS

| No. | RT<br>(min) | Formula                                        | M(Da)    | [M+H] <sup>+</sup> (m/z) |      |                                         |                   |                  |
|-----|-------------|------------------------------------------------|----------|--------------------------|------|-----------------------------------------|-------------------|------------------|
|     |             |                                                |          | Indicated                | ppm  | Prominent MS <sup>2</sup> fragmentation | Identification    | metabolite class |
| 1   | 2.16        | C <sub>15</sub> H <sub>20</sub> O <sub>5</sub> | 280.1310 | 281.1389                 | 1.8  | 281,245,227,203,156,107,91              | Zedoalactone B    | guaiane-type     |
| 2   | 5.74        | C <sub>15</sub> H <sub>22</sub> O <sub>3</sub> | 250.1569 | 251.1644                 | 1.1  | 233,215,191,173,165,159,145             | Aerugidiol        | guaiane-type     |
| 3   | 7.06        | C <sub>15</sub> H <sub>20</sub> O <sub>4</sub> | 264.1362 | 265.1434                 | 2.5  | 247,229,121,105,91                      | Zedoarofuran      | eudesmane-type   |
| 4   | 7.51        | C <sub>15</sub> H <sub>18</sub> O <sub>3</sub> | 246.1256 | 247.1333                 | 1.5  | 247,229,189,183,128,105                 | Zederone          | germacrane-type  |
| 5   | 9.16        | C <sub>15</sub> H <sub>24</sub> O <sub>3</sub> | 252.1725 | 253.1800                 | 0.6  | 253,235,189,175,147,133,107             | Zedoarondiol      | guaiane-type     |
| 6   | 10.25       | C <sub>15</sub> H <sub>20</sub> O              | 216.1514 | 217.1588                 | 0.3  | 217,199,169,157,128,131,55              | Furanodiene       | germacrane-type  |
| 7   | 10.25       | C <sub>15</sub> H <sub>22</sub> O <sub>2</sub> | 234.1620 | 235.1693                 | 0.3  | 235,217,189,135                         | Curcumenol        | guaiane-type     |
| 8   | 10.71       | C <sub>15</sub> H <sub>22</sub> O <sub>2</sub> | 234.1620 | 235.1693                 | 0.5  | 235,177,161,105,91                      | Curcumenone       | carane-type      |
| 9   | 11.15       | C <sub>15</sub> H <sub>16</sub> O              | 212.1201 | 213.1274                 | -0.2 | 213,197,155,128,69                      | Pyrocurzerenone   | laserane-type    |
| 10  | 11.17       | C <sub>15</sub> H <sub>18</sub> O <sub>2</sub> | 230.1307 | 231.1381                 | -0.2 | 231,213,185,157,142,128                 | Curzerenone       | elemene-type     |
| 11  | 11.20       | C <sub>21</sub> H <sub>22</sub> O <sub>6</sub> | 370.1416 | 371.1489                 | 0.5  | 371,177,137,117                         | Dihydrocurcumin   | curcumins-type   |
| 12* | 11.23       | C <sub>20</sub> H <sub>18</sub> O <sub>5</sub> | 338.3539 | 339.1230                 | 1.0  | 339,255,223,177,147,119                 | Demethoxycurcumin | curcumins-type   |

|     |       |                                                |          |          |      |                           |                     |                 |
|-----|-------|------------------------------------------------|----------|----------|------|---------------------------|---------------------|-----------------|
| 13* | 11.57 | C <sub>21</sub> H <sub>20</sub> O <sub>6</sub> | 368.1260 | 369.1339 | 1.0  | 369,285,253,177,145,117   | Curcumin            | curcumins-type  |
| 14  | 12.25 | C <sub>15</sub> H <sub>24</sub> O <sub>2</sub> | 236.1776 | 237.1851 | 0.9  | 237,219,135,107,93,81     | Neocurdione         | germacrane-type |
| 15* | 13.03 | C <sub>15</sub> H <sub>24</sub> O <sub>2</sub> | 236.1776 | 237.1848 | -0.5 | 219,135,107,93,79,67      | Curdione            | germacrane-type |
| 16  | 13.47 | C <sub>15</sub> H <sub>16</sub> O <sub>2</sub> | 228.1150 | 229.1223 | 2.1  | 229,213,201               | Curzeone            | cadinane-type   |
| 17  | 14.37 | C <sub>15</sub> H <sub>20</sub> O <sub>2</sub> | 232.1463 | 233.1536 | 0.8  | 233,175,147,105,119,91    | Furanogermenone     | germacrane-type |
| 18  | 16.38 | C <sub>15</sub> H <sub>20</sub> O <sub>3</sub> | 248.1410 | 249.1488 | 1.0  | 249,203,163,143,105,91,69 | Curcumenolactones A | carane-type     |
| 19* | 16.55 | C <sub>15</sub> H <sub>24</sub> O <sub>2</sub> | 236.1776 | 237.1850 | 0.5  | 237,163,135,95,69         | Curcumol            | guaiane-type    |
| 20* | 17.02 | C <sub>15</sub> H <sub>22</sub> O              | 218.1671 | 219.1745 | 0.5  | 219,159,129,105,81        | Germacrone          | germacrane-type |
| 21  | 17.48 | C <sub>15</sub> H <sub>24</sub> O              | 220.3505 | 221.1900 | 0.2  | 221,203,151,123,109,95,81 | Bisacurool          | bisabolane-type |

---

\* means this component is identified by compared with standard substance.
